# Supplementary material for: Mining of co-expression genes in response to cold stress at maize (Zea mays L.) germination and sprouting stages by weighted gene co-expression networks analysis
Source: PeerJ. 2025 Mar 11;13:e19124. doi: 10.7717/peerj.19124 (PMC11908442; doi:10.7717/peerj.19124)
Supplement: Supplemental Information 7 [file peerj-13-19124-s007.xlsx]

## Sheet: Sheet1
Supplemental Table S1. Functional annotation of hub genes in the modules associating with low-temperature tolerance.
Module Name	Gene ID	Gene symbol	Gene Annotation	References
blue	Zm00001d019706	LOC100280372	uncharacterized
	Zm00001d018659	LOC100278925	uncharacterized
	Zm00001d039316	LOC100284105	seed maturation protein
	Zm00001d014861	LOC103626480	uncharacterized
	Zm00001d017675	LOC100283476	uncharacterized
	Zm00001d009211	LOC100283241	uncharacterized
	Zm00001d028325	LOC100191562	cytochrome P450 superfamily protein	Chopra et al., 2015; Wang et al., 2009
	Zm00001d048527	LOC542515	rolled leaf 1
	Zm00001d049239	LOC100282150	adenosylhomocysteinase
	Zm00001d033849	LOC100276374	COMPASS-like H3K4 histone methylase component WDR5A	Tian et al., 2023; Xu et al., 2019; Zhang et al., 2018; Zhang et al., 2017
yellow	Zm00001d013135	LOC100285298	ribose-5-phosphate isomerase
	Zm00001d013274	LOC100280423	uncharacterized
	Zm00001d003884	LOC103646542	uncharacterized
	Zm00001d046434	LOC100273668	acyl-CoA binding protein pseudogene	Xiao & Chye, 2009; Xiao & Chye, 2011; Yurchenko & Weselake, 2011
	Zm00001d008542	NA	uncharacterized
	Zm00001d013648	LOC103628039	uncharacterized
	Zm00001d002506	NA	uncharacterized
	Zm00001d036086	LOC103631112	enolase 1-like
	Zm00001d020938	LOC100272950	uncharacterized
	Zm00001d020500	NA	uncharacterized
turquoise	Zm00001d027480	LOC100383301	calcium-dependent protein kinase family protein	Cheng et al., 2002; Ranty et al., 2016
	Zm00001d004138	LOC100285326	uncharacterized
	Zm00001d016299	NA	Mitochondrial carrier protein CoAc2
	Zm00001d042052	LOC100285591	NAD kinase 1
	Zm00001d021842	LOC100127532	uncharacterized
	Zm00001d008665	LOC100286109	dehydration-responsive element-binding protein 2A	Ohama et al., 2017; Liu et al., 1998; Sakuma et al., 2006
	Zm00001d042921	LOC100281390	SLT1 protein
	Zm00001d044461	LOC100279543	uncharacterized
	Zm00001d015319	LOC100274509	uncharacterized
	Zm00001d047800	LOC100280228	uncharacterized
magenta	Zm00001d026050	LOC100273177	uncharacterized
	Zm00001d026153	NA	uncharacterized
	Zm00001d043855	LOC100276778	DUF1639 family protein
	Zm00001d049400	LOC100279725	Transcription factor GTE7
	Zm00001d010380	LOC100275868	uncharacterized
	Zm00001d007102	LOC100282914	RING zinc finger domain superfamily protein	Li et al., 2022; Li et al., 2011; Ma et al., 2009; Yang et al., 2019
	Zm00001d005244	LOC100284949	bZIP transcription factor superfamily protein	Baillo et al., 2019; He et al., 2024; Li et al., 2020
	Zm00001d042886	LOC100282657	uncharacterized
	Zm00001d017422	LOC100285460	homeobox-leucine zipper protein ATHB-6
	Zm00001d042480	LOC103650877	U-box domain-containing protein 45
