# Supplementary material for: Mining of co-expression genes in response to cold stress at maize (Zea mays L.) germination and sprouting stages by weighted gene co-expression networks analysis
Source: PeerJ. 2025 Mar 11;13:e19124. doi: 10.7717/peerj.19124 (PMC11908442; doi:10.7717/peerj.19124)
Supplement: Supplemental Information 8 [file peerj-13-19124-s008.xlsx]

## Sheet: Sheet1
Raw RT-qPCR data
ID	GR					GS					BR					BS
	0h	6h	12h	24h	36h	0h	6h	12h	24h	36h	0h	6h	12h	24h	36h	0h	6h	12h	24h	36h
Zm00001d002533	1	8.45	14.51	19.51	22.32	0.11	5.12	7.66	7.31	5.75	1	19.26	5.72	7.26	13.25	0.98	1.15	1.03	1.12	0.93
	1.02	8.94	15.03	19	22.69	0.98	5.13	7.46	8.92	5.69	1.02	20.19	6.1	7.97	14.09	1.06	1.23	1.29	1.32	1.32
	0.95	8.56	16.32	19.32	23.1	0.98	4.92	7.32	7.49	5.27	0.95	21.45	5.67	8.02	13.79	0.95	1.34	1.32	1.27	1.46
Zm00001d003601	1	25.65	44.3	40.5	49.72	0.95	15.6	24.5	27.6	13.2	1	22.76	29.37	41.35	38.73	0.89	24.3	42.5	37.6	26.7
	1.2	25.79	40.19	43.22	50.69	1.01	16.32	24.91	29.37	13.26	1.2	23.97	30.12	42	40.12	1.11	25.19	41.29	38.49	27.81
	1	26.13	43.97	40.97	50.13	0.98	15.41	25.16	27.56	13.59	1	24.16	29.35	42.73	38.56	1.09	23.46	41.34	38.24	26.39
Zm00001d010863	0.98	6.67	17.42	25.43	20.65	1	0.85	1.74	0.82	0.54	0.98	5.51	2.53	2.33	1.86	0.97	0.44	0.33	0.4	0.26
	1.11	7.13	17.69	25.63	20.09	1	1.09	2.14	1.32	0.35	1.11	5.69	2.49	3.1	2.13	1	0.64	0.72	0.9	0.5
	1.05	7.98	18.02	25.49	19.73	1.05	1.2	1.98	1.49	0.69	1.05	5.47	2.5	2.79	1.97	1.02	0.61	0.62	0.6	0.38
Zm00001d022125	1.1	1.9	4.58	14.79	16.76	1.02	2.66	1.8	2.46	0.49	1.1	7.04	6.99	8.32	8.96	1	2.66	2.11	1.59	1.25
	1.15	2.46	5.76	14.32	16.44	1.1	2.9	1.76	2.89	0.6	1.15	6.45	6.52	9.32	10.56	1.13	2.49	2.93	1.42	1.45
	0.97	2.65	5.49	14.09	16.5	1.02	3.1	1.31	2.64	0.85	0.97	6.76	6.84	9.47	9.03	1	2.46	2.76	1.69	1.65
Zm00001d028401	1	2.25	2.81	2.66	4.63	1	3.42	2.46	6.3	5.9	1	20.6	17.23	20.5	16.5	0.91	3.55	4.77	7.31	3.86
	0.8	1.73	2.89	2.73	4.32	0.96	3..44	2.5	6.91	6.16	0.8	20.39	17.46	20.62	16.42	1	4.2	5.04	7.39	3.97
	1.2	1.59	2.71	2.16	4.78	1	3.59	2.61	5.59	6.12	1.2	21.19	18.52	21.36	16.96	1	3.97	4.92	7.42	3.84
Zm00001d030310	0.98	1.12	5.4	6.97	7.26	1	1.12	0.54	1.88	2.22	0.98	23.88	18.96	10.03	4.25	1	30.26	14.76	16.8	10.6
	0.89	1.58	5.03	7.42	7.39	1	1.3	0.68	2.03	2.1	0.89	23.46	19.37	11.06	4.57	1.23	31.11	15.06	17.65	11.64
	1.12	1.79	5.41	6.64	6.9	1.21	0.97	0.79	2.3	2.09	1.12	22.93	20.13	10.94	4.39	1	30.85	14.49	18.12	10.68
Zm00001d034099	1	12.6	15.4	13.6	12.58	1.11	0.69	2.74	2.87	3.14	1	2.17	1.07	1.54	0.87	1.13	4.45	4.33	5.55	5.65
	0.86	10.43	15.69	13.54	13.19	0.9	0.59	3.41	3	3.42	0.86	1.87	1.36	1.79	1.23	0.86	4.95	5.1	5.92	5.13
	1.06	10.52	15.32	14.03	12.61	0.81	0.4	3.09	2.95	4.11	1.06	2.3	1.58	1.84	1.49	1.24	5.06	4.68	5.46	5.69
Zm00001d039718	0.8	1.92	1.76	11.89	19.36	1.19	0.46	1.18	2.67	1.78	0.8	13.26	11.27	6.55	5.23	0.8	11.34	8.76	5.22	4.35
	0.9	2.46	1.45	11.24	19.44	1	0.32	0.97	3.1	2.16	0.9	14.65	12.39	7.31	6	1.07	12.43	8.94	5.06	4.64
	1	2.3	1.43	11.69	19.06	0.82	0.29	1.32	2.55	1.89	1	14.38	11.59	7.02	5.82	0.82	11.69	8.32	5.32	4.72
Zm00001d045557	1	7.76	33.43	26.62	24.56	1	0.19	3.12	4.27	5.31	1	32.67	42.7	36.46	29.56	1	25.64	26.49	25.69	26.36
	0.8	7.94	33.19	26.09	26.14	0.88	0.21	3.97	4.57	5.85	0.8	34.56	44.09	38.26	30.12	0.86	25.33	27.46	26.84	26.1
	0.8	8.01	35.72	25.41	24.19	0.78	0.15	4.01	3.88	5.46	0.8	33.97	42.98	36.42	29.97	0.81	24.56	28.39	26.09	26.66
Zm00001d047705	1	10.5	18.6	18.6	24.3	1	5.6	5.5	9.7	10.2	1	4.62	7.89	9.74	14.28	0.97	7.9	8.4	8.7	10.1
	0.95	11.2	20.06	20.06	25.32	1	6.9	5.69	10.13	9.78	0.95	5.93	6.54	10.11	15.62	1	8.94	8.12	10.9	11.23
	1	10.56	17.14	17.14	23.56	0.96	5.73	6.02	10.52	9.12	1	5.84	7.13	10.94	16.75	0.86	7.51	7.93	9.54	10.85
