# Supplementary material for: Mining of co-expression genes in response to cold stress at maize (Zea mays L.) germination and sprouting stages by weighted gene co-expression networks analysis
Source: PeerJ. 2025 Mar 11;13:e19124. doi: 10.7717/peerj.19124 (PMC11908442; doi:10.7717/peerj.19124)
Supplement: Supplemental Information 9 [file peerj-13-19124-s009.xlsx]

## Sheet: Sheet1
Module	Category	Description	Count	RichFactor	Pvalue
Blue	BP	GO:1901700 response to oxygen-containing compound	511	0.106881	5.3e-26
	BP	GO:0009719 response to endogenous stimulus	441	0.0988346	1.3e-16
	BP	GO:0009791 post-embryonic development	420	0.0987306	9.9e-16
	BP	GO:0009314 response to radiation	260	0.112945	1.3e-15
	BP	GO:0009266 response to temperature stimulus	219	0.119022	2.3e-15
	BP	GO:0009416 response to light stimulus	249	0.113907	2.3e-15
	BP	GO:0003006 developmental process involved in reproduction	395	0.0987994	7.9e-15
	BP	GO:0099402 plant organ development	285	0.102962	1.3e-12
	BP	GO:0009725 response to hormone	377	0.095443	2.9e-12
	BP	GO:0010286 heat acclimation	42	0.270968	9.5e-10
	MF	GO:0001071 nucleic acid binding transcription factor activity	200	0.107933	1.2e-10
	MF	GO:0003700 transcription factor activity, sequence-specific DNA binding	199	0.107568	1.7e-10
	MF	GO:0003677 DNA binding	421	0.0865721	1.9e-08
	MF	GO:0032440 2-alkenal reductase [NAD(P)] activity	37	0.150407	1.5e-05
	CC	GO:0005886 plasma membrane	603	0.0887026	6.8e-14
	CC	GO:0071944 cell periphery	708	0.0857662	1.2e-13
	CC	GO:0005737 cytoplasm	1465	0.0746383	7.6e-11
	CC	GO:0005634 nucleus	994	0.0787077	8.3e-11
	CC	GO:0044444 cytoplasmic part	1244	0.0753528	2.2e-09
	CC	GO:0009506 plasmodesma	189	0.102162	1.8e-08
	CC	GO:0055044 symplast	189	0.102162	1.8e-08
	CC	GO:0005794 Golgi apparatus	222	0.0975395	3e-08
	CC	GO:0031090 organelle membrane	317	0.0896493	7.8e-08
	CC	GO:0044815 DNA packaging complex	27	0.153409	0.00015
Yellow	BP	GO:1901700 response to oxygen-containing compound	148	0.0309559	9.8e-09
	BP	GO:0009737 response to abscisic acid	58	0.0381579	1.7e-06
	BP	GO:0009725 response to hormone	117	0.0296203	3.9e-06
	BP	GO:0001101 response to acid chemical	95	0.0313015	4.3e-06
	BP	GO:1901701 cellular response to oxygen-containing compound	69	0.0342602	6.3e-06
	BP	GO:0006950 response to stress	290	0.0241526	7e-06
	BP	GO:0009409 response to cold	47	0.0392648	8.2e-06
	BP	GO:0010035 response to inorganic substance	91	0.0311644	8.3e-06
	BP	GO:0009414 response to water deprivation	39	0.0402893	2.8e-05
	BP	GO:0009755 hormone-mediated signaling pathway	65	0.0317383	0.00011
Turquoise	BP	GO:1901700 response to oxygen-containing compound	638	0.133445	2.1e-58
	BP	GO:0009725 response to hormone	500	0.126582	7.2e-39
	BP	GO:0009738 abscisic acid-activated signaling pathway	121	0.195161	9.9e-22
	BP	GO:0009753 response to jasmonic acid	135	0.147702	4.3e-15
	BP	GO:0071446 cellular response to salicylic acid stimulus	99	0.158654	5.1e-13
	BP	GO:0009620 response to fungus	140	0.134745	7e-13
	BP	GO:0050776 regulation of immune response	117	0.144981	8.8e-13
	BP	GO:0090150 establishment of protein localization to membrane	111	0.14702	1.6e-12
	BP	GO:0010941 regulation of cell death	141	0.132519	1.7e-12
	BP	GO:0009409 response to cold	143	0.119465	8.2e-10
	MF	GO:0003700 transcription factor activity, sequence-specific DNA binding	222	0.12	8.9e-15
	MF	GO:0001071 nucleic acid binding transcription factor activity	223	0.120345	5.9e-15
	MF	GO:0004674 protein serine/threonine kinase activity	165	0.105837	9e-08
	MF	GO:0043565 sequence-specific DNA binding	144	0.105263	7.9e-07
	MF	GO:0005516 calmodulin binding	48	0.145015	4.4e-06
	MF	GO:0004842 ubiquitin-protein transferase activity	103	0.107516	1.3e-05
	MF	GO:0019787 ubiquitin-like protein transferase activity	103	0.105641	2.5e-05
	MF	GO:0046914 transition metal ion binding	368	0.0835035	3.8e-05
	MF	GO:0008270 zinc ion binding	274	0.0857053	8.8e-05
	MF	GO:0043167 ion binding	575	0.0786379	9.9e-05
	CC	GO:0005886 plasma membrane	605	0.0889968	3.7e-12
	CC	GO:0071944 cell periphery	688	0.0833434	5.1e-09
	CC	GO:0044464 cell part	2167	0.0714757	2e-07
	CC	GO:0005623 cell	2169	0.0713229	5e-07
	CC	GO:0005634 nucleus	981	0.0776784	4.1e-07
	CC	GO:0043231 intracellular membrane-bounded organelle	1628	0.0723942	4.5e-05
	CC	GO:0043227 membrane-bounded organelle	1633	0.0723976	4.2e-05
	CC	GO:0031224 intrinsic component of membrane	1366	0.0729818	0.00015
	CC	GO:0016021 integral component of membrane	1360	0.0728754	0.0002
Magenta	BP	GO:2000112 regulation of cellular macromolecule biosynthetic process	62	0.00880182	7.6e-06
	BP	GO:0006355 regulation of transcription, DNA-templated	59	0.0089516	8.3e-06
	BP	GO:1903506 regulation of nucleic acid-templated transcription	59	0.0088842	1.1e-05
	BP	GO:1901700 response to oxygen-containing compound	45	0.00941226	4.3e-05
	BP	GO:0051171 regulation of nitrogen compound metabolic process	67	0.00804225	5.5e-05
	BP	GO:0010468 regulation of gene expression	64	0.00816639	5.6e-05
	BP	GO:0032774 RNA biosynthetic process	64	0.00810948	6.9e-05
	BP	GO:0071229 cellular response to acid chemical	20	0.0137457	7.6e-05
	BP	GO:0009873 ethylene-activated signaling pathway	9	0.0258621	0.0001
	BP	GO:0009725 response to hormone	37	0.00936709	0.00026
	MF	GO:0001071 nucleic acid binding transcription factor activity	30	0.01619	3.4e-08
	MF	GO:0003700 transcription factor activity, sequence-specific DNA binding	30	0.0162162	3.3e-08
	MF	GO:0008270 zinc ion binding	33	0.0103222	0.0001
	MF	GO:0046914 transition metal ion binding	39	0.00884956	0.00053
