# Supplementary material for: Mining of co-expression genes in response to cold stress at maize (Zea mays L.) germination and sprouting stages by weighted gene co-expression networks analysis
Source: PeerJ. 2025 Mar 11;13:e19124. doi: 10.7717/peerj.19124 (PMC11908442; doi:10.7717/peerj.19124)
Supplement: Supplemental Information 10 [file peerj-13-19124-s010.xlsx]

## Sheet: Sheet1
ITEM TO CHECK	IMPORTANCE	CHECKLIST
EXPERIMENTAL DESIGN
Definition of experimental and control groups	E	(Zhongxi 091/O2) (Chang 7-2)	L70
Number within each group	E	3	L70
Assay carried out by core lab or investigator's lab?	D
Acknowledgement of authors' contributions	D
SAMPLE
Description	E	germinated seed embryos/germinated seeds	L78-L87
Volume/mass of sample processed	D	0.6 g of plant tissue	L78-L87
Microdissection or macrodissection	E	macrodissection	L78-L87
Processing procedure	E	RNA extraction	L78-L87
If frozen - how and how quickly?	E	Liquid nitrogen quick freezing	L78-L87
If fixed - with what, how quickly?	E	NOT involved	L78-L87
Sample storage conditions and duration (especially for FFPE samples)	E	NOT involved	L78-L87
NUCLEIC ACID EXTRACTION
Procedure and/or instrumentation	E	RNA extraction, library construction, and sequencing	L96-L105
Name of kit and details of any modifications	E	Polysaccharide Polyphenol Plant Total RNA Extraction Kit	L96-L105
Source of additional reagents used	D
Details of DNase or RNAse treatment	E	RNAs were treated with DNase I	L96-L105
Contamination assessment (DNA or RNA)	E	NO Contamination	L96-L105
Nucleic acid quantification	E	Good	L96-L105
Instrument and method	E	RNAprep pure plant kit	L96-L105
Purity (A260/A280)	D	1.9-2.0
Yield	D	1μg	L96-L105
RNA integrity method/instrument	E	RIN	L96-L105
RIN/RQI or Cq of 3' and 5' transcripts	E	RIN:10	L96-L105
Electrophoresis traces	D
Inhibition testing (Cq dilutions, spike or other)	E	Cq dilutions	L96-L105
REVERSE TRANSCRIPTION
Complete reaction conditions	E	The RNA (1 mg) was used as a template for cDNA synthesis with the RT primer Mix (Random 6mers and Oligo dT Primer mixed) and PrimerScript RT Enzyme Mix I (TaKaRa).	L129
Amount of RNA and reaction volume	E	1 μL and 20 μL	L129
Priming oligonucleotide (if using GSP) and concentration	E	Random 6mers and Oligo dT Primer mixed	L129
Reverse transcriptase and concentration	E	RevertAid m-mul URT 1ul	L129
Temperature and time	E	95 ℃ for 5 min, 95 ℃ for 15 s, 58 ℃ for 30 s, and 70 ℃ for 30 s, for a total of 35 cycles.	L129-L130
Manufacturer of reagents and catalogue numbers	D
Cqs with and without RT	D*
Storage conditions of cDNA	D
qPCR TARGET INFORMATION
If multiplex, efficiency and LOD of each assay.	E
Sequence accession number	E
Location of amplicon	D
Amplicon length	E	300	Table 1
In silico specificity screen (BLAST, etc)	E
Pseudogenes, retropseudogenes or other homologs?	D
Sequence alignment	D
Secondary structure analysis of amplicon	D
Location of each primer by exon or intron (if applicable)	E
What splice variants are targeted?	E
qPCR OLIGONUCLEOTIDES
Primer sequences	E	Table 1
RTPrimerDB Identification Number	D
Probe sequences	D**
Location and identity of any modifications	E	No
Manufacturer of oligonucleotides	D	Sangon Biotech, China
Purification method	D
qPCR PROTOCOL
Complete reaction conditions	E		L121-L133
Reaction volume and amount of cDNA/DNA	E	1 μL and 25 μL	L121-L133
Primer, (probe), Mg++ and dNTP concentrations	E	250nM	L121-L133
Polymerase identity and concentration	E	0.1μL	L121-L133
Buffer/kit identity and manufacturer	E	TaKaRa	L121-L133
Exact chemical constitution of the buffer	D
Additives (SYBR Green I, DMSO, etc.)	E	SYBRGreen PCR Mastermix (TaKaRa)	L121-L133
Manufacturer of plates/tubes and catalog number	D
Complete thermocycling parameters	E	TaKaRa	L121-L133
Reaction setup (manual/robotic)	D
Manufacturer of qPCR instrument	E	ABI (Applied Biosystems)	L121-L133
qPCR VALIDATION
Evidence of optimisation (from gradients)	D
Specificity (gel, sequence, melt, or digest)	E
For SYBR Green I, Cq of the NTC	E
Standard curves with slope and y-intercept	E
PCR efficiency calculated from slope	E
Confidence interval for PCR efficiency or standard error	D
r2 of standard curve	E
Linear dynamic range	E
Cq variation at lower limit	E
Confidence intervals throughout range	D
Evidence for limit of detection	E
If multiplex, efficiency and LOD of each assay.	E
DATA ANALYSIS
qPCR analysis program (source, version)	E
Cq method determination	E	2-∆∆Ct method	L121-L133	Figure 8
Outlier identification and disposition	E
Results of NTCs	E	0	L121-L133	Figure 8
Justification of number and choice of reference genes	E	1	L121-L133	Figure 8
Description of normalisation method	E
Number and concordance of biological replicates	D
Number and stage (RT or qPCR) of technical replicates	E	3	L121-L133	Figure 8
Repeatability (intra-assay variation)	E	High	L121-L133	Figure 8
Reproducibility (inter-assay variation, %CV)	D
Power analysis	D
Statistical methods for result significance	E	ANOVA	L121-L133	Figure 8
Software (source, version)	E	R.4.3.2	L121-L133	Figure 8
Cq or raw data submission using RDML	D
Table 1. MIQE checklist for authors, reviewers and editors. All essential information (E) must be submitted with the manuscript. Desirable
information (D) should be submitted if available. If using primers obtained from RTPrimerDB, information on qPCR target, oligonucleotides,
protocols and validation is available from that source.
*: Assessing the absence of DNA using a no RT assay is essential when first extracting RNA. Once the sample has been validated as
RDNA-free, inclusion of a no-RT control is desirable, but no longer essential.
**: Disclosure of the probe sequence is highly desirable and strongly encouraged. However, since not all commercial pre-designed assay
vendors provide this information, it cannot be an essential requirement. Use of such assays is advised against.
