# Supplementary material for: Mining of co-expression genes in response to cold stress at maize (Zea mays L.) germination and sprouting stages by weighted gene co-expression networks analysis
Source: PeerJ. 2025 Mar 11;13:e19124. doi: 10.7717/peerj.19124 (PMC11908442; doi:10.7717/peerj.19124)
Supplement: Supplemental Information 11 [file peerj-13-19124-s011.xlsx]

## Sheet: Sheet1
Module	ID	Pathway	DEGsInPathway	GenesInPathway	Pvalue	FDR
Blue	ko04075	plant hormone signal transduction	6	39	0.00451064	1
	ko02024	quorum sensing	3	12	0.0113781	1
	ko00710	carbon fixation in photosynthetic organisms	4	25	0.0175869	1
	ko04151	pi3k-Akt signaling pathway	4	25	0.0175869	1
	ko00902	monoterpenoid biosynthesis	1	1	0.0412371	1
	ko01051	biosynthesis of ansamycins	1	1	0.0412371	1
	ko04217	necroptosis	3	21	0.0526737	1
	ko00400	phenylalanine, tyrosine and tryptophan biosynthesis	3	23	0.066144	1
	ko00061	fatty acid biosynthesis	2	11	0.0726099	1
	ko04152	ampk signaling pathway	3	24	0.0734155	1
Yellow	ko04075	plant hormone signal transduction	7	39	0.000338323	0.0883024
	ko04016	mapk signaling pathway - plant	5	40	0.0124521	1
	ko00750	vitamin B6 metabolism	2	7	0.0234068	1
	ko00906	carotenoid biosynthesis	3	18	0.0240992	1
	ko00480	glutathione metabolism	3	19	0.0278988	1
	ko04013	mapk signaling pathway - fly	2	11	0.0559151	1
	ko00380	tryptophan metabolism	2	12	0.065583	1
	ko04210	apoptosis	2	12	0.065583	1
	ko00430	taurine and hypotaurine metabolism	1	2	0.0699755	1
	ko00500	starch and sucrose metabolism	3	31	0.0956876	1
turquoise	ko04016	mapk signaling pathway - plant	9	40	3.58261e-06	0.00093506
	ko04075	plant hormone signal transduction	8	39	2.71572e-05	0.00354402
	ko00940	phenylpropanoid biosynthesis	3	17	0.0171683	1
	ko04391	hippo signaling pathway - fly	2	7	0.0205711	1
	ko00942	anthocyanin biosynthesis	1	1	0.0332709	1
	ko00941	flavonoid biosynthesis	2	13	0.0671982	1
	ko04068	foxo signaling pathway	2	17	0.107673	1
	ko04144	endocytosis	4	55	0.107702	1
	ko00270	cysteine and methionine metabolism	3	39	0.137965	1
	ko00020	citrate cycle (TCA cycle)	2	20	0.141275	1
magenta	ko04075	plant hormone signal transduction	4	39	0.000374337	0.0977019
	ko04016	mapk signaling pathway - plant	3	40	0.00557798	0.708776
	ko00052	galactose metabolism	2	15	0.00814685	0.708776
	ko00240	pyrimidine metabolism	2	30	0.031031	1
	ko00500	starch and sucrose metabolism	2	31	0.0329863	1
	ko00010	glycolysis / Gluconeogenesis	2	34	0.0391358	1
	ko00520	amino sugar and nucleotide sugar metabolism	2	40	0.0526253	1
	ko00904	diterpenoid biosynthesis	1	7	0.0638758	1
	ko00062	fatty acid elongation	1	8	0.0726781	1
	ko04371	apelin signaling pathway	1	14	0.123863	1
